# Supplementary material
Source: PubMed Central journal article supplement (PMC2735940)
Supplement: JCI38864sd.pdf [file JCI38864sd.pdf]

*Supplementary Information*

**Acquisition of the contractile phenotype of arterial smooth muscle cells depends on the miR-143/145 gene cluster**

Thomas Boettger, Nadine Beetz, Sawa Kostin, Johanna Schneider, Marcus

Krüger, Lutz Hein & Thomas Braun

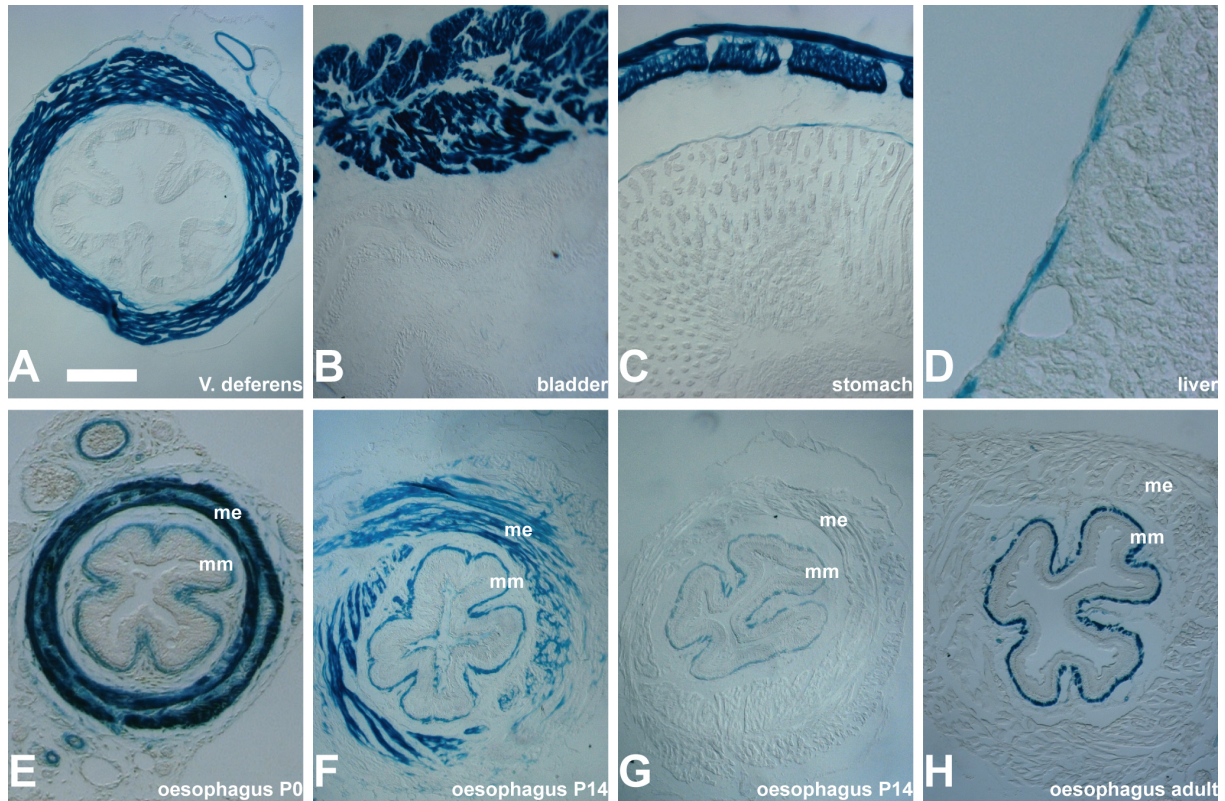

**Supplementary Figure 1: The miR-143/145 locus is active in smooth muscle cells of all SMC-containing organs.**

Expression of the LacZ reporter, which indicates activity of the miR-143/145 locus, was detected in all parts of the smooth muscle coat of the Vas deferens (A), in the smooth muscle layers of the adult bladder (B), and in the stomach (C). In the liver (D), a signal was found in smooth muscle cells of the ramifications of the portal vein. The expression of the miR-143/145 reporter in the oesophagus (E-H) follows the described expression of other smooth muscle genes: At P0 (E) the reporter was expressed in the muscularis mucosae (mm) and the muscularis externa (me). At P14, expression in the esophagus was detected in the muscularis mucosa. Expression in the muscularis externa at this stage was only found proximal (F) but not distal to the stomach (G) since the distal part of the muscularis externa contains skeletal muscle cells at this stage. In the adult esophagus lacZ staining was only found in the muscularis mucosa (H). Scale bar corresponds to 189  $\mu\text{m}$  in A, B, C, F, G, H, 46  $\mu\text{m}$  in D, 94  $\mu\text{m}$  in E.

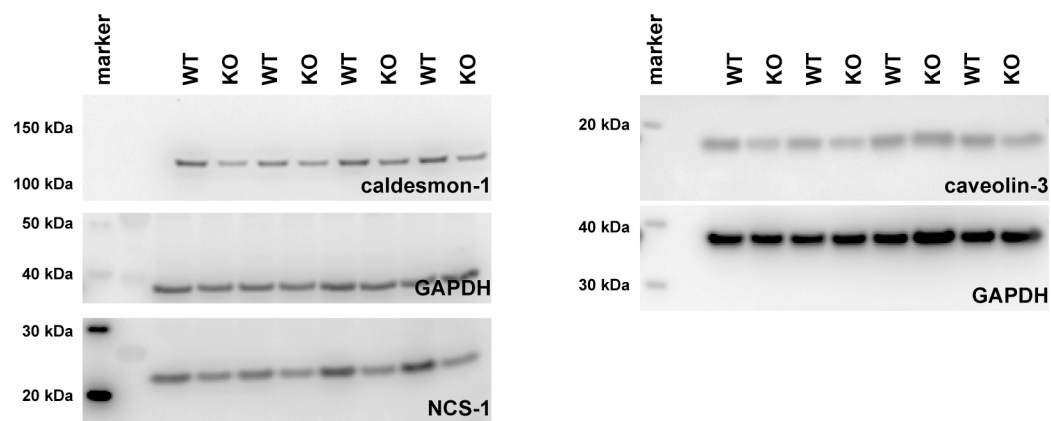

**Supplementary Figure 2: The loss of mir-143/45 causes multiple secondary changes of protein expression.**

Western blot analysis of caveolin-3, NCS-1 and caldesmon-1 expression in aortae of WT and miR-143/145 KO mice. Western blots were normalized to corresponding GAPDH signals. Please note the down-regulation of caveolin-3, NCS-1 and caldesmon-1 proteins, which were also found to be down-regulated in Affymetrix expression analysis. The GAPDH normalized ratio KO/WT was 0.7, 0.59 and 0.55 for caveolin-3, NCS-1 and caldesmon-1, respectively (n=4/4, p<0.05).

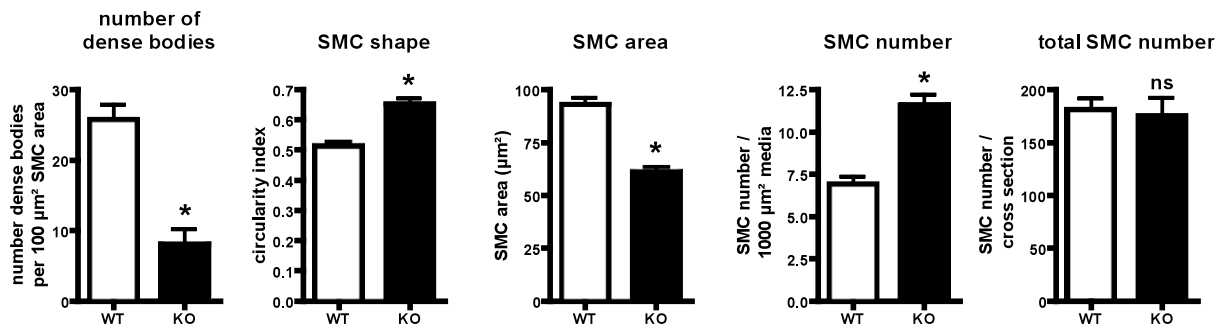

**Supplementary Figure 3: Changes in morphological parameters reflecting the phenotypic switch of VSMCs from contractile to synthetic.** Detailed morphometric analysis of VSMCs in the A. femoralis of KO and WT animals. A striking reduction in the number of dense bodies, which are essential to strengthen and support the contractile apparatus in VSMCs, was detected in KO animals ( $8.02 \pm 2.19$  in KO compared to  $25.7 \pm 2.13$  in WT; mean  $\pm$  SEM,  $n=3$  for each genotype,  $p$ -value=0.0044 as determined by unpaired t-test). The VSMCs of KO mice were much more oval than those in WT (circularity index:  $0.51 \pm 0.01$  in WT compared to  $0.65 \pm 0.02$  in KO; mean  $\pm$  SEM,  $n=3$  for each genotype,  $p$ -value=0.0038 as determined by unpaired t-test). The shape of VSMCs (circularity index) was determined concomitantly with the area covered by VSMCs using the Image J program with at least 300 randomly selected cells per 3 transversally sectioned arterial segments (minimum 100  $\mu$ m). The size of the VSMCs of the KO was reduced, the number of VSMC/area was increased, while the total cell number did not change significantly (Number of VSMC/cross section in WT  $181 \pm 11$  compared to  $175 \pm 18$  in KO mice; mean  $\pm$  SEM,  $n=3$  for each genotype,  $p$ -value=0.7848 as determined by unpaired t-test. VSMC area  $92.78 \pm 3.30$  in WT compared to  $61.23 \pm 2.28$  in KO; mean  $\pm$  SEM,  $n=3$  for each genotype,  $p$ -value=0.0014 as determined by unpaired t-test, Number of VSMC/1000  $\mu$ m<sup>2</sup> media in WT  $6.9 \pm 0.4$  compared to  $11.6 \pm 0.6$ ; mean  $\pm$  SEM,  $n=3$  for each genotype,  $p$ -value=0.0037 as determined by unpaired t-test). Quantitative measurements support our conclusion that the decreased medial wall thickness is due to decreased cell size but not due to decreased total cell number. (\* indicates significance  $p < 0.005$ ,  $n=3/3$  animals). The data clearly indicate the switch from contractile to synthetic VSMCs.

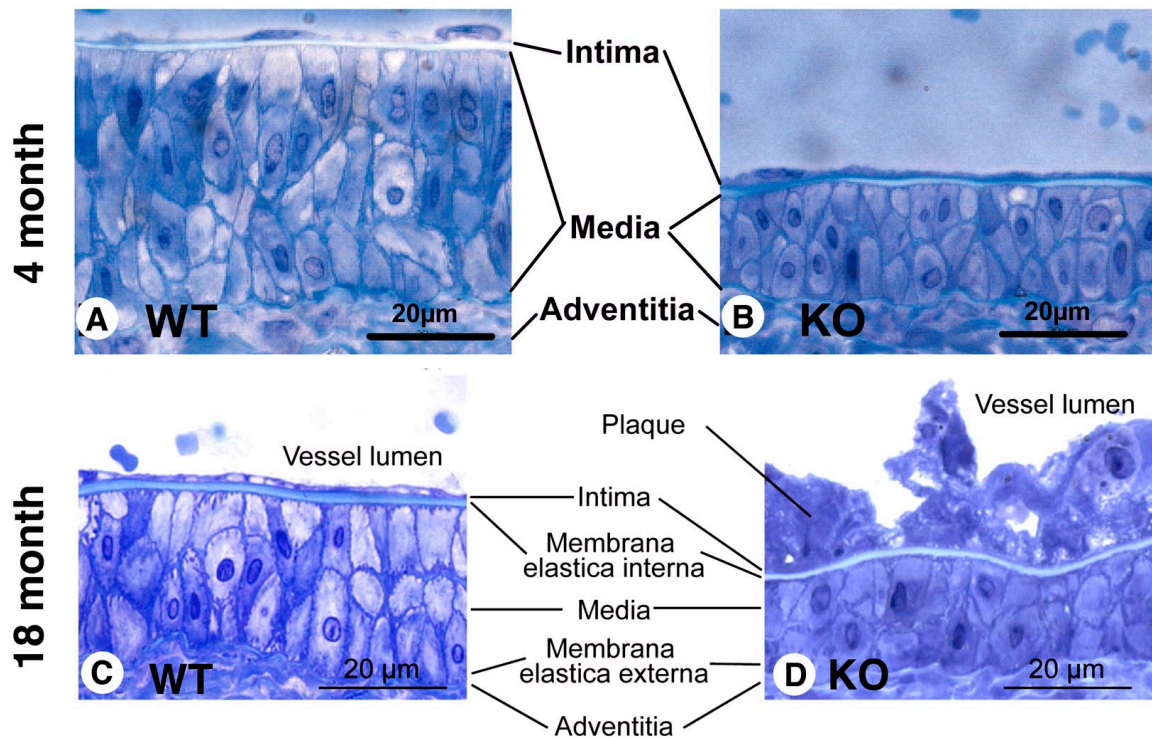

**Supplementary Figure 4: Changes in the morphology of vessels walls of mutant mice at different ages.** (A-B) Representative light microscopic images comparing the thickness of the media in WT and mutant vessel walls. Note the reduced cellular area of VSMCs and a decreased media thickness in mutant compared to WT mice. (C, D) Vessels of older mutant mice (18 month) did frequently contain neointimal lesions, which were never seen in WT mice.

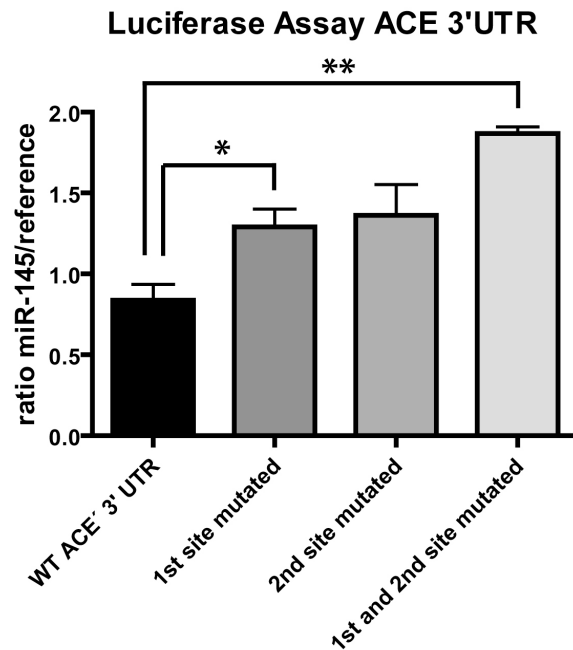

**Supplementary Figure 5: miR-145 specifically reduces activity of a luciferase-reporter under the control of the ACE 3' UTR.** Results of co-transfection experiments of a luciferase reporter plasmid carrying WT or mutated miR-145 bindings sites and a miR-145 expression vector in Hela-cells are shown. Higher luciferase activities, i.e. reduced repression by the co-transfected miR-145 plasmid was scored when reporter with mutations in the first or second miR-145 target or a combination of both were used. Changes were significant compared to the WT-vector (\*  $p < 0.05$ ; \*\*  $p < 0.001$ ). A part of the ACE 3' UTR was PCR-amplified (GCTCGTGGCCACCGTGGGTCTCGCC, TAGGCCTTCCAAAGGATGGCTGA GG) and cloned into the XbaI site of pGL3 (Promega) immediately 3' of the luciferase ORF. Mutants of the UTR were constructed using mutated oligonucleotides and a two- or three step PCR. The first predicted miR-145 target site was mutated from GGAGTGTCCCATAAGAACTGGA to GGAGTGTCCCATAAGAAAtgaaA. The second target site was mutated from GGGAAGCCAGGGACAGGA to GGGAAGCCAGGGACAttc and a vector with mutation of both sites was prepared. 50% confluent Hela-1 cells on 24-well plates were co-transfected using Lipofectamine 2000 (Invitrogen) with luciferase vectors (80 ng) together with a renilla vector (pRL-TK, Promega; 20 ng) with 167 nM mmu-mir-145 miRIDIAN Mimic or a control-miR (Thermo Scientific Dharmacon), respectively. Each transfection was done in triplicate. Cells were lysed after 48 h and luciferase and renilla activities were determined using the Dual-Luciferase® Reporter Assay (Promega) and a Mithras LB940 plate reader (Berthold Technologies). miR-145 ratios were normalized to the respective controls.

| <b>Protein Names</b>                                       | <b>Symbol</b>    | <b>ratio</b> |
|------------------------------------------------------------|------------------|--------------|
| Quinone oxidoreductase; Crystallin, zeta                   | Cryz             | 9.2          |
| protein N-myristoyltransferase 1                           | Nmt1             | 6.7          |
| CD166 antigen precursor                                    | Alcam            | 5.5          |
| collectin sub-family member 12                             | Colec12          | 5.1          |
| <b>Angiotensin-converting enzyme</b>                       | <b>Ace</b>       | <b>4.9</b>   |
| Thiosulfate sulfurtransferase                              | Tst              | 4.2          |
| Malic enzyme 1                                             | Me1, Mod-1, Mod1 | 3.8          |
| Adenosine kinase                                           | Adk              | 3.6          |
| myosin heavy chain 10, non-muscle                          | Myh10            | 3.6          |
| FK506-binding protein 3                                    | Fkbp3, Fkbp25    | 3.4          |
| Ectonucleotide pyrophosphatase                             | Enpp1, Npps      | 3.4          |
| Tubulin beta-4 chain                                       | Tubb4            | 3.3          |
| Tubulin beta-5 chain                                       | Tubb5            | 3.1          |
| Fatty acid-binding protein, heart                          | Fabp3, Fabph1    | 3.1          |
| Versican core protein precursor                            | Vcan, Cspg2      | 2.7          |
| Glia maturation factor beta                                | Gmfb             | 2.7          |
| Protein disulfide-isomerase A3 precursor                   | Pdia3, Erp       | 2.7          |
| Hyaluronan and proteoglycan link protein 1 precursor       | Hapln1, Crtl1    | 2.7          |
| Heat shock protein 90 kDa beta member 1                    | Hsp90b1, Tra-1   | 2.6          |
| Epoxide hydrolase 2                                        | Ephx2, Eph2      | 2.6          |
| Stress-associated endoplasmic reticulum protein 2          | Serp2, Ramp4     | 2.5          |
| Ubiquitin carboxyl-terminal hydrolase 5                    | Usp5, Isot       | 2.4          |
| Leukocyte elastase inhibitor A                             | Serpib1a         | 2.3          |
| <b>Tropomyosin alpha-4 chain;Tropomyosin-4</b>             | <b>Tpm4</b>      | <b>2.1</b>   |
| Glutathione S-transferase                                  | Gstm1, Gstm3     | 2.1          |
| 4F2 cell-surface antigen heavy chain                       | Slc3a2, Mdu1     | 2.1          |
| Platelet-activating factor acetylhydrolase IB subunit beta | Pafah1b2         | 2.0          |
| Insulin degrading enzyme                                   | Ide              | 2.0          |
| Microtubule-associated protein 1B                          | Map1b, Mtap5     | 2.0          |
| Golgi integral membrane protein 4                          | Golim4           | 1.9          |
| Enolase 3                                                  | Eno3             | 1.8          |
| Hook homolog 3                                             | Hook3            | 1.7          |
| Nucleoside diphosphate kinase A                            | Nme1             | 1.7          |
| CD31 antigen                                               | Pecam1           | 1.7          |
| Fibrinogen gamma chain precursor                           | Fgg              | 1.7          |
| Spectrin alpha 2                                           | Spna2            | 1.7          |
| myosin regulatory light chain A, smooth muscle homolog;    | 2900073G15Rik    | 1.6          |
| Elongation factor 2;EF-2                                   | Eef2             | 1.6          |
| Calnexin precursor                                         | Canx             | 1.6          |
| Aldose reductase homolog                                   | 2310005E10Rik    | 1.6          |
| Glutathione S-transferase Mu 5                             | Gstm5            | 1.6          |

## Supplementary Table 1 SILAC-detected proteins up-regulated in aortae miR-143/145

### KO vs. WT.

A selection of proteins is shown that are detected to be significantly up-regulated in the SILAC experiment ( $p < 0.05$ ,  $n = 3/3$ ).



| <b>Protein Names</b>                                                   | <b>Symbol</b>          | <b>ratio</b> |
|------------------------------------------------------------------------|------------------------|--------------|
| ribosomal protein L7                                                   | Rpl7                   | 0.1          |
| <b>Calcium/calmodulin-dependent protein kinase type II gamma chain</b> | <b>Camk2g</b>          | <b>0.1</b>   |
| Tubulin polymerization-promoting protein family member 3               | Tppp3                  | 0.2          |
| Eukaryotic translation initiation factor 2C 2;Argonaute-2;S            | Eif2c2, Ago2           | 0.3          |
| Melanoma-associated antigen MUC18;CD146 antigen                        | Mcam                   | 0.4          |
| Nuclear mitotic apparatus protein 1 homolog                            | Numa1                  | 0.4          |
| Serine/threonine-protein phosphatase PP1-beta catalytic subunit        | Ppp1cb                 | 0.4          |
| protein kinase c delta-binding protein homolog                         | Prkcdbp                | 0.4          |
| Laminin subunit beta-2                                                 | Lamb2                  | 0.4          |
| Cytoglobin                                                             | Cygb                   | 0.4          |
| <b>Smoothelin</b>                                                      | <b>Smtn</b>            | <b>0.4</b>   |
| Laminin subunit gamma-1 precursor;Laminin B2 chain                     | Lamc1, Lamb-2          | 0.4          |
| Histone H2A type 2-A                                                   | Hist2h2aa1             | 0.4          |
| Glutamyl aminopeptidase;CD249 antigen                                  | Enpep                  | 0.5          |
| Histone H4                                                             | Hist1h4a               | 0.5          |
| Insulin-like growth factor-binding protein 7                           | Igfbp7, Mac25          | 0.5          |
| Laminin subunit alpha-4 precursor                                      | Lama4                  | 0.5          |
| <b>CPI-17, Protein phosphatase 1 regulatory subunit 14A;17 kDa</b>     | <b>Ppp1r14a, Cpi17</b> | <b>0.5</b>   |
| Heterogeneous nuclear ribonucleoprotein D-like                         | Hnrpdl                 | 0.5          |
| Voltage-dependent calcium channel subunit alpha-2/delta-1              | Cacna2d1               | 0.5          |
| Histone H2B type 1-H                                                   | Hist1h2bh              | 0.6          |
| Calcium-binding protein 39                                             | Cab39                  | 0.6          |
| <b>MLCK Myosin light chain kinase, smooth muscle</b>                   | <b>Mylk</b>            | <b>0.6</b>   |
| Tenascin X;Tenascin-X                                                  | Tnxb                   | 0.6          |
| CD81 antigen                                                           | Cd81                   | 0.6          |
| Clusterin precursor                                                    | Clu, Apoj              | 0.6          |
| Integrin alpha-5 precursor                                             | Itga5                  | 0.6          |
| Sodium/potassium-transporting ATPase subunit beta-3                    | Atp1b3                 | 0.6          |
| PDGF-associated protein                                                | Pdap1                  | 0.6          |
| UNR-interacting protein                                                | Strap, Unrip           | 0.6          |
| NADPH-dependent carbonyl reductase                                     | Dhrs4, D14Ucla2        | 0.6          |
| Glycolipid transfer protein;GLTP                                       | Gltg                   | 0.6          |
| Caveolin-2                                                             | Cav2                   | 0.6          |

**Supplementary Table 2: SILAC-detected proteins down-regulated in aortae miR-143/145 KO vs. WT.**

A selection of proteins is shown, which was significantly down-regulated in the SILAC experiment ( $p < 0.05$ ,  $n = 3/3$ ). Selected markers of smooth muscle contraction are marked in red.



| Probe Set ID | Gene Title                                                           | Gene Symbol  | FC   |
|--------------|----------------------------------------------------------------------|--------------|------|
| 1417464_at   | troponin C2, fast                                                    | Tnnc2        | 5.57 |
| 1435354_at   | potassium inwardly-rectifying channel, subfam. J, member 15          | Kcnj15       | 5.13 |
| 1427735_a_at | actin, alpha 1, skeletal muscle                                      | Acta1        | 4.74 |
| 1419608_a_at | melanoma inhibitory activity 1                                       | Mia1         | 4.68 |
| 1416889_at   | troponin I, skeletal, fast 2                                         | Tnni2        | 4.24 |
| 1425425_a_at | Wnt inhibitory factor 1                                              | Wif1         | 3.84 |
| 1448756_at   | S100 calcium binding protein A9 (calgranulin B)                      | S100a9       | 3.48 |
| 1419312_at   | ATPase, Ca <sup>++</sup> transporting, cardiac muscle, fast twitch 1 | Atp2a1/SERCA | 3.36 |
| 1434411_at   | collagen, type XII, alpha 1                                          | Col12a1      | 3.27 |
| 1419473_a_at | Cholecystokinin                                                      | Cck          | 3.17 |
| 1419394_s_at | S100 calcium binding protein A8 (calgranulin A)                      | S100a8       | 3.16 |
| 1418480_at   | pro-platelet basic protein                                           | Pbbp         | 2.82 |
| 1448371_at   | myosin light chain, phosphorylatable, fast skeletal muscle           | Mylpf        | 2.75 |
| 1422926_at   | melanocortin 2 receptor                                              | Mc2r         | 2.68 |
| 1424525_at   | gastrin releasing peptide                                            | Grp          | 2.54 |
| 1437466_at   | activated leukocyte cell adhesion molecule                           | Alcam        | 2.36 |
| 1449577_x_at | tropomyosin 2, beta                                                  | Tpm2         | 2.35 |
| 1423100_at   | FBJ osteosarcoma oncogene                                            | Fos          | 2.15 |
| 1450468_at   | Myocilin                                                             | Myoc         | 2.13 |
| 1423062_at   | insulin-like growth factor binding protein 3                         | Igfbp3       | 2.05 |
| 1419693_at   | collectin sub-family member 12                                       | Colec12      | 2.05 |
| 1433883_at   | tropomyosin 4                                                        | Tpm4         | 2.02 |
| 1452661_at   | transferrin receptor                                                 | Tfrc         | 1.99 |
| 1419871_at   | Protein phosphatase 2 regulatory subunit A, beta isoform             | Ppp2r1b      | 1.90 |
| 1449286_at   | netrin G1                                                            | Ntng1        | 1.87 |
| 1418445_at   | solute carrier family 16, member 2                                   | Slc16a2      | 1.87 |
| 1425151_a_at | NADPH oxidase organizer 1                                            | Noxo1        | 1.85 |
| 1429262_at   | Ras association (RalGDS/AF-6) domain family member 6                 | Rassf6       | 1.83 |
| 1437401_at   | insulin-like growth factor 1                                         | Igf1         | 1.79 |
| 1420647_a_at | keratin 8                                                            | Krt8         | 1.78 |
| 1451912_a_at | fibroblast growth factor receptor-like 1                             | Fgfr1        | 1.77 |
| 1433486_at   | chloride channel 3                                                   | Clcn3        | 1.73 |
| 1427183_at   | EGF-containing fibulin-like extracellular matrix protein 1           | Efemp1       | 1.71 |
| 1452890_at   | tubulin tyrosine ligase-like family, member 5                        | Ttll5        | 1.71 |
| 1433694_at   | phosphodiesterase 3B, cGMP-inhibited                                 | Pde3b        | 1.71 |
| 1438610_a_at | crystallin, zeta                                                     | Cryz         | 1.68 |
| 1447623_s_at | protein kinase D1                                                    | Prkd1        | 1.68 |
| 1438292_x_at | adenosine kinase                                                     | Adk          | 1.65 |
| 1435184_at   | natriuretic peptide receptor 3                                       | Npr3         | 1.61 |
| 1452398_at   | phospholipase C, epsilon 1                                           | Plce1        | 1.59 |
| 1451501_a_at | growth hormone receptor                                              | Ghr          | 1.56 |
| 1448570_at   | glia maturation factor, beta                                         | Gmfb         | 1.47 |
| 1422208_a_at | guanine nucleotide binding protein (G protein), beta 5               | Gnb5         | 1.45 |

**Supplementary Table 3: Selected transcripts detected up-regulated in miR-143/145 KO vs. WT aortae.**

A selection of transcripts, which was up-regulated in the Affymetrix GeneChip analysis, is shown ( $p < 0.05$ ,  $n = 5/5$ ; see methods). Selected signaling molecules, markers of smooth muscle contraction and of skeletal muscle differentiation are marked in yellow, red and blue, respectively.

| Probe Set ID | Gene Title                                                     | Gene Symbol      | FC   |
|--------------|----------------------------------------------------------------|------------------|------|
| 1417462_at   | CAP, adenylate cyclase-associated protein 1 (yeast)            | Cap1             | 0.14 |
| 1420942_s_at | regulator of G-protein signaling 5                             | Rgs5             | 0.23 |
| 1421698_a_at | collagen, type XIX, alpha 1                                    | Col19a1          | 0.24 |
| 1449525_at   | flavin containing monooxygenase 3                              | Fmo3             | 0.27 |
| 1437559_at   | regulator of G-protein signalling 7 binding protein            | Rgs7bp           | 0.27 |
| 1431167_at   | diacylglycerol kinase, gamma                                   | Dgkg             | 0.32 |
| 1446527_at   | angiotensin II receptor, type 1b                               | Agtr1b           | 0.34 |
| 1437933_at   | Hedgehog-interacting protein                                   | Hhip             | 0.35 |
| 1417701_at   | protein phosphatase 1, regulatory (inhibitor) subunit 14c      | Ppp1r14c         | 0.37 |
| 1450389_s_at | phosphatidylinositol-4-phosphate 5-kinase, type 1 beta         | Pip5k1b          | 0.39 |
| 1434887_at   | frequenin homolog (Drosophila)                                 | Freq             | 0.41 |
| 1449522_at   | unc-5 homolog C (C. elegans)                                   | Unc5c            | 0.41 |
| 1416286_at   | regulator of G-protein signaling 4                             | Rgs4             | 0.42 |
| 1435720_at   | potassium voltage-gated channel, Shal-related family, member 3 | Kcnd3            | 0.42 |
| 1449876_at   | protein kinase, cGMP-dependent, type I                         | Prkg1            | 0.45 |
| 1448598_at   | matrix metalloproteinase 17                                    | Mmp17            | 0.45 |
| 1460729_at   | Rho-associated coiled-coil containing protein kinase 1         | Rock1            | 0.45 |
| 1450700_at   | CDC42 effector protein (Rho GTPase binding) 3                  | Cdc42ep3         | 0.47 |
| 1423635_at   | bone morphogenetic protein 2                                   | Bmp2             | 0.47 |
| 1455158_at   | integrin alpha 3                                               | Itga3            | 0.48 |
| 1435541_at   | betacellulin, epidermal growth factor family member            | Btc              | 0.49 |
| 1416357_a_at | melanoma cell adhesion molecule                                | Mcam             | 0.50 |
| 1424768_at   | caldesmon 1                                                    | Cald1            | 0.50 |
| 1454159_a_at | insulin-like growth factor binding protein 2                   | Igfbp2           | 0.50 |
| 1423222_at   | CAP, adenylate cyclase-associated protein, 2 (yeast)           | Cap2             | 0.52 |
| 1433489_s_at | fibroblast growth factor receptor 2                            | Fgfr2            | 0.52 |
| 1430286_s_at | protein phosphatase 1, regulatory (inhibitor) subunit 14c      | Ppp1r14c, CPI-17 | 0.54 |
| 1441042_at   | fibroblast growth factor 1                                     | Fgf1             | 0.54 |
| 1418413_at   | caveolin 3                                                     | Cav3             | 0.54 |
| 1423585_at   | insulin-like growth factor binding protein 7                   | Igfbp7           | 0.56 |
| 1452476_at   | calcium channel, voltage-dependent, beta 2 subunit             | Cacnb2           | 0.57 |
| 1423942_a_at | calcium/calmodulin-dependent protein kinase II gamma           | Camk2g           | 0.58 |
| 1418744_s_at | similar to Tescalcin, tescalcin                                | Tesc             | 0.58 |
| 1416701_at   | Rho family GTPase 3                                            | Rnd3             | 0.58 |
| 1449660_s_at | coronin, actin binding protein 1C                              | Coro1c           | 0.60 |
| 1423049_a_at | tropomyosin 1, alpha                                           | Tpm1             | 0.61 |
| 1424051_at   | collagen, type IV, alpha 2                                     | Col4a2           | 0.61 |
| 1422670_at   | Rho family GTPase 2                                            | Rnd2             | 0.62 |
| 1433682_at   | Rho guanine nucleotide exchange factor (GEF) 17                | Arhgef17         | 0.63 |
| 1423771_at   | protein kinase C, delta binding protein                        | Prkcdp           | 0.64 |
| 1419161_a_at | NADPH oxidase 4                                                | Nox4             | 0.64 |
| 1424131_at   | collagen, type VI, alpha 3                                     | Col6a3           | 0.64 |
| 1417312_at   | dickkopf homolog 3 (Xenopus laevis)                            | Dkk3             | 0.65 |
| 1437734_at   | protein phosphatase 1, regulatory subunit 12A (Ppp1r12a)       | MYPT1            | 0.66 |
| 1425506_at   | myosin, light polypeptide kinase                               | Mylk             | 0.70 |

#### Supplementary Table 4: Selected transcripts detected down-regulated in miR-143/145

##### KO vs. WT aortae.

A selection of transcripts which was down-regulated in the Affymetrix GeneChip analysis is shown ( $p < 0.05$ ,  $n = 5/5$ ; see methods). Selected signaling molecules and markers of smooth muscle contraction are marked in yellow and red, respectively.

**A) Selected target transcripts identified by Affymetrix GeneChip analysis**

| Gene Title                                        | Symbol       | p-value       | FC         | miRNA                   | database   |
|---------------------------------------------------|--------------|---------------|------------|-------------------------|------------|
| Wnt inhibitory factor 1                           | Wif1         | 0.0095        | 3.8        | miR-145                 | #          |
| <b>activated leukocyte cell adhesion molecule</b> | <b>Alcam</b> | <b>0.0239</b> | <b>2.4</b> | <b>miR-145</b>          | <b>#</b>   |
| <b>tropomyosin 4</b>                              | <b>Tpm4</b>  | <b>0.0002</b> | <b>2.0</b> | <b>miR-143, miR-145</b> | <b>#</b>   |
| solute carrier family 16a2                        | Slc16a2      | 0.0015        | 1.9        | miR-143, miR-145        | #§         |
| NADPH oxidase organizer 1                         | Noxo1        | 0.0162        | 1.8        | miR-145                 | *          |
| <b>crystallin, zeta</b>                           | <b>Cryz</b>  | <b>0.0041</b> | <b>1.7</b> | <b>miR-143</b>          | <b>#*</b>  |
| phospholipase C, epsilon 1                        | Plce1        | 0.0042        | 1.6        | miR-145                 | *§         |
| <b>glia maturation factor, beta</b>               | <b>Gmfb</b>  | <b>0.0002</b> | <b>1.5</b> | <b>miR-145</b>          | <b>#§</b>  |
| Rho GTPase activating protein 12                  | Arhgap12     | 0.0150        | 1.5        | miR-145                 | #          |
| <b>FK506 binding protein 3</b>                    | <b>Fkbp3</b> | <b>0.0041</b> | <b>1.3</b> | <b>miR-145</b>          | <b>#*§</b> |

**B) Target proteins identified by SILAC analysis of protein expression**

| Gene Title                                         | Symbol       | p-value       | ratio      | miRNA                   | database   |
|----------------------------------------------------|--------------|---------------|------------|-------------------------|------------|
| <b>crystallin, zeta</b>                            | <b>Cryz</b>  | <b>0.0271</b> | <b>9.2</b> | <b>miR-143</b>          | <b>#*</b>  |
| N-myristoyltransferase                             | Nmt1         | 0.0049        | 6.7        | miR-143                 | §          |
| <b>activated leukocyte cell adhesion molecule</b>  | <b>Alcam</b> | <b>0.0351</b> | <b>5.5</b> | <b>miR-145</b>          | <b>#</b>   |
| <b>Angiotensin-converting enzyme</b>               | <b>Ace</b>   | <b>0.0074</b> | <b>4.9</b> | <b>miR-145</b>          | <b>*</b>   |
| myosin, heavy polypeptide 10, non-muscle           | Myh10        | 0.0108        | 3.6        | miR-143                 | #          |
| <b>FK506 binding protein 3</b>                     | <b>Fkbp3</b> | <b>0.0430</b> | <b>3.4</b> | <b>miR-145</b>          | <b>#*§</b> |
| Type I phosphodiesterase                           | NPP1         | 0.0025        | 3.4        | miR-143, miR-145        | #          |
| Versican core protein                              | Vcan         | 0.0291        | 2.7        | miR-143                 | #*         |
| <b>glia maturation factor, beta</b>                | <b>Gmfb</b>  | <b>0.0024</b> | <b>2.7</b> | <b>miR-145</b>          | <b>#§</b>  |
| Ubiquitin specific peptidase 5                     | Usp5         | 0.0153        | 2.4        | miR-145                 | #          |
| <b>Tropomyosin 4</b>                               | <b>Tpm4</b>  | <b>0.0466</b> | <b>2.1</b> | <b>miR-143, miR-145</b> | <b>#</b>   |
| Platelet-activating factor acetylhydrolase IB beta | Pafah1b2     | 0.0252        | 2.0        | miR-143, miR-145        | #          |
| Microtubule-associated protein 1B                  | Map1b        | 0.0217        | 2.0        | miR-143                 | #§         |
| Platelet endothelial cell adhesion molecule        | Pecam1       | 0.0392        | 1.7        | miR-145                 | #          |

**Supplementary Table 5: Analysis of mRNA and protein expression in miR-143/145 knockout mice and identification of target proteins.**

(A) Transcriptional profiling of aortae from miR-143/145 knockout in comparison to WT mice (n=5/5) using Affymetrix GeneChip® Mouse Genome 430 2.0 arrays. Arrays were analyzed using the RMA algorithm. An unpaired t-test was performed for significance analysis. Fold changes and p-values are shown. (B) Quantitative comparative proteome analysis of protein extracts isolated from knockout and wild-type mouse aortae (n=3/3). Wild-type mice completely labeled with the 13C6Lys-substituted version of lysine ("SILAC mice") were used as a reference. Ratios of detected proteins were calculated using the maxquant 11.5 software. Ratios and p-values were calculated from the mean of three 13C6Lys-WT/WT and three 13C6Lys-WT/KO ratios. Lists of significantly up-regulated molecules were compared to predicted targets of mir-143 and miR-145 using the matchminer tool (18). Targets detected to be up-regulated by both unbiased screens at transcript- and protein level are in bold print; \*, #, § label targets predicted by miRBase, miRNA.org or TargetScan, respectively.
